# Supplementary material for: A semiconducting liquid crystalline block copolymer containing regioregular poly(3-hexylthiophene) and nematic poly(n-hexyl isocyanate) and its application in bulk heterojunction solar cells
Source: Royal Society of Chemistry journal article supplement (doi:10.1039/c4ta02852j), 2014-01-01
Supplement: c4ta02852j1.pdf [file c4ta02852j1.pdf]

Supporting Information for:

**Semiconducting Liquid Crystalline Block Copolymer Containing  
Regioregular Poly(3-Hexylthiophene) and Nematic Poly(*n*-Hexyl Isocyanate)**

*Mahesh P. Bhatt, Jia Du, Elizabeth A. Rainbolt, Taniya M.S.K. Pathiranage, Peishen Huang,  
James F. Reuther, Bruce M. Novak, Michael C. Biewer, and Mihaela C. Stefan\**

Department of Chemistry, University of Texas at Dallas, Richardson, TX, 75080, USA

### Synthesis of allyl-terminated P3HT

A 250 mL three neck flask with stir bar was flushed with nitrogen for 5 minutes. Tetrahydrofuran (THF) (10 mL) and 2,5-dibromo-3-hexylthiophene (1.63 g) (5.0 mmol) were injected into the flask via syringe. t-Butylmagnesium chloride (2.5 mL), (5.0 mmol) added into the reaction mixture and stirred for 90 minutes. At that point a sample from the reaction mixture was taken and analyzed by GC-MS to monitor the conversion of monomer. Catalyst, Ni(dppp)Cl<sub>2</sub> (0.04 g) (0.07 mmol) was added into the reaction mixture and stirred for 8 minutes. Allyl magnesium bromide (3 mL), (3.0 mmol) was injected into the reaction mixture. The polymer was quenched in methanol and purified by the Soxhlet extraction with methanol, hexane and chloroform. <sup>1</sup>H NMR (500 MHz, CDCl<sub>3</sub>): δH 0.9 (t, 3H), 1.35-1.43 (m, 6H), 1.69 (t, 2H), 2.80 (t, 2H), 3.49 (d, 2H), 5.11 (m, 2H), 5.98 (m, 1H), 6.98 (s, 1H), SEC: M<sub>n</sub> = 12000 gmol<sup>-1</sup>; PDI = 1.20.

### Synthesis of hydroxypropyl-terminated P3HT

Allyl-terminated P3HT (0.10 g, M<sub>n</sub> = 12000 gmol<sup>-1</sup>) was dissolved in 100 mL of THF under a nitrogen atmosphere. To this solution, 0.5 M of 9-BBN (2 mL, 2 mmol) was added via syringe. The reaction mixture was stirred for 12 h at 40°C. The reaction mixture was cooled to room temperature followed by the addition of a solution of sodium hydroxide (2 mL, 6 M). After 15 min, 2 mL of 33% aqueous solution of H<sub>2</sub>O<sub>2</sub> was slowly added to the reaction mixture. After 6 h the polymer was precipitated in methanol and purified by Soxhlet extraction with methanol. The polymer (M<sub>n</sub> = 12000gmol<sup>-1</sup>) was characterized by <sup>1</sup>HNMR.

<sup>1</sup>H NMR (500 MHz, CDCl<sub>3</sub>): δH 0.9 (t, 3H), 1.35-1.43 (m, 6H), 1.69 (t, 2H), 1.95 (t, 2H), 2.80 (t, 2H), 3.76 (t, 2H), 6.98 (s, 1H), SEC: M<sub>n</sub> = 12000 gmol<sup>-1</sup>; PDI = 1.20

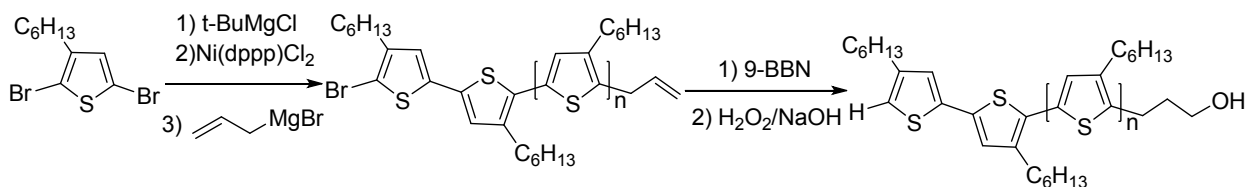

**Scheme S1.** Synthesis of hydroxypropyl-terminated P3HT

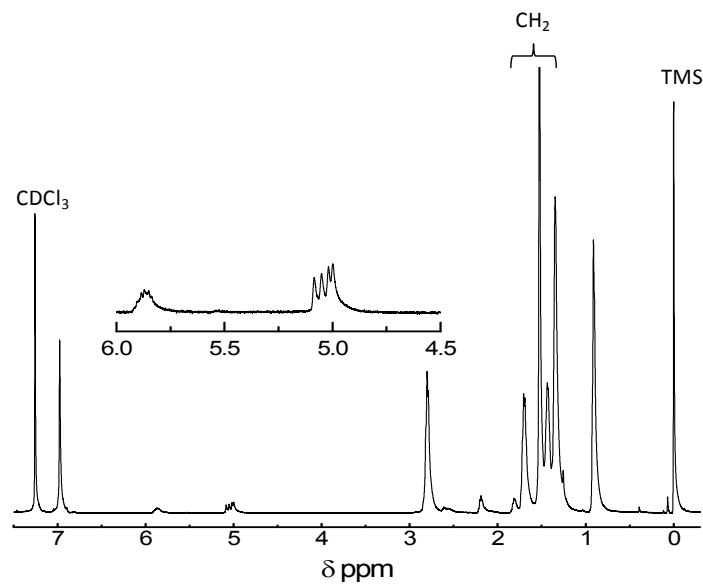

**Figure S1.**  $^1\text{H}$  NMR spectrum of allyl-terminated P3HT

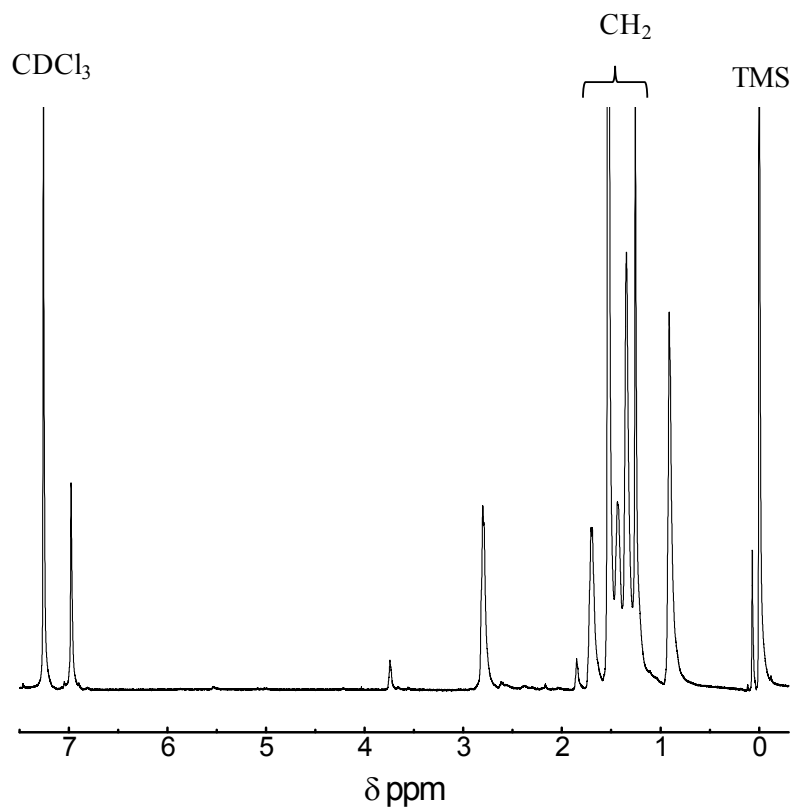

**Figure S2.**  $^1\text{H}$  NMR spectrum of hydroxypropyl-terminated P3HT

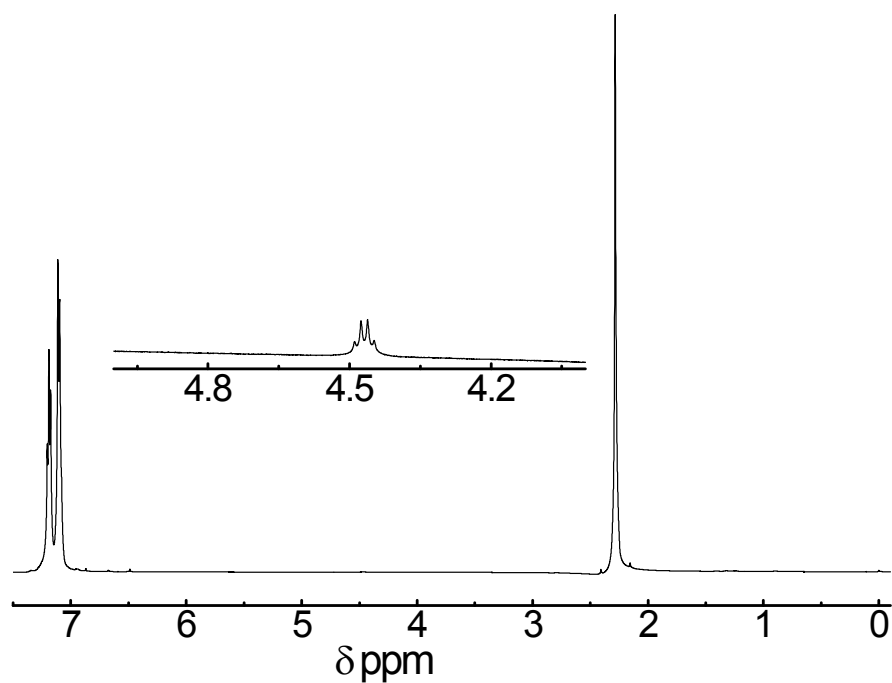

**Figure S3.**  $^1\text{H}$  NMR spectrum of titanium propoxide terminated P3HT (before addition of hexyl isocyanate monomer)

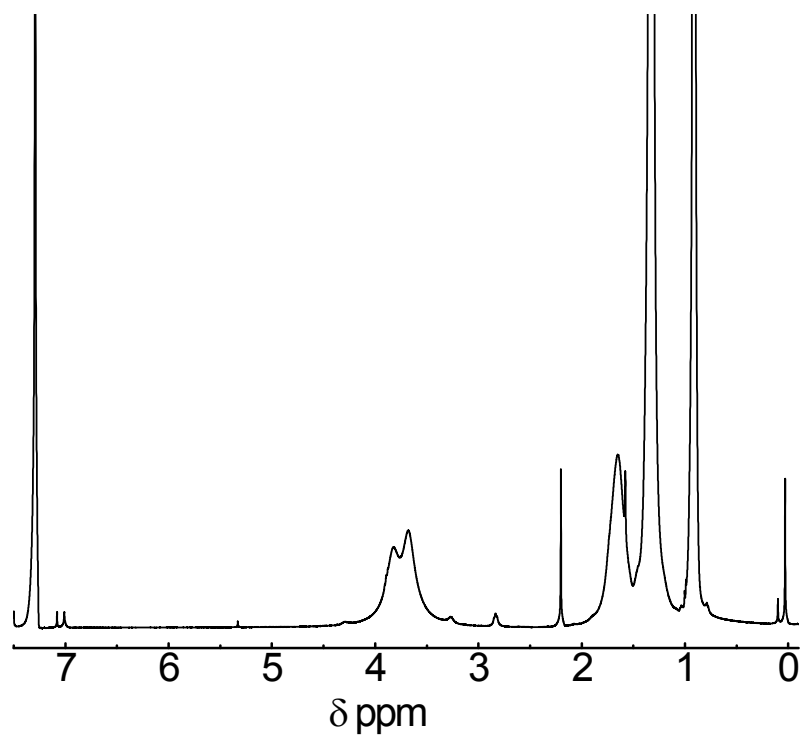

**Figure S4.**  $^1\text{H}$  NMR spectrum of P3HT-*b*-PHIC (90 mol% of PHIC determined by  $^1\text{H}$  NMR,  $M_n = 21000 \text{ gmol}^{-1}$  estimated from SEC with THF eluent and polystyrene calibration)

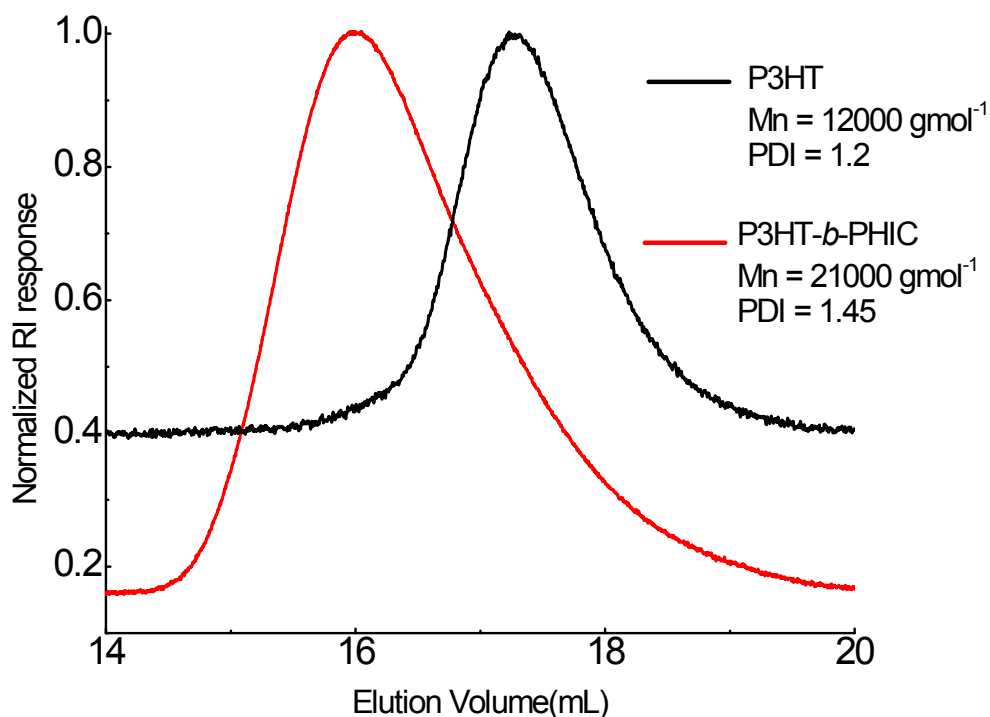

**Figure S5.** SEC traces of P3HT-*b*-PHIC di block copolymer (red) and precursor P3HT (black) (estimated from SEC with THF eluent and polystyrene calibration)

#### ***Synthesis of PHIC using the chiral (R)-BINOL-Ti(IV) diisopropoxide Catalyst***

Hexyl isocyanate (1.93 g, 15.2 mmol, Sigma Aldrich, 97%) was used as received and placed in an oven-dried vial in a  $\text{N}_2$  atmosphere glove box along with 0.5 mL of dry chloroform. The (R)-BINOL-Ti(IV) diisopropoxide catalyst (0.025 g, 56.6  $\mu\text{mol}$ ) was added to the stirring solution and the reaction mixture was agitated for 24 hours at room temperature. The crude, gelled product was removed from the glove box and redissolved in about 4 mL of  $\text{CHCl}_3$ . The polymer was then precipitated from MeOH and isolated by vacuum filtration. The product was dried under high vacuum and the precipitation process was repeated once more ensure the removal of residual catalyst. The product was then dried under high vacuum to afford pure product ( $M_n$  = 13000  $\text{g mol}^{-1}$ , PDI = 1.3).

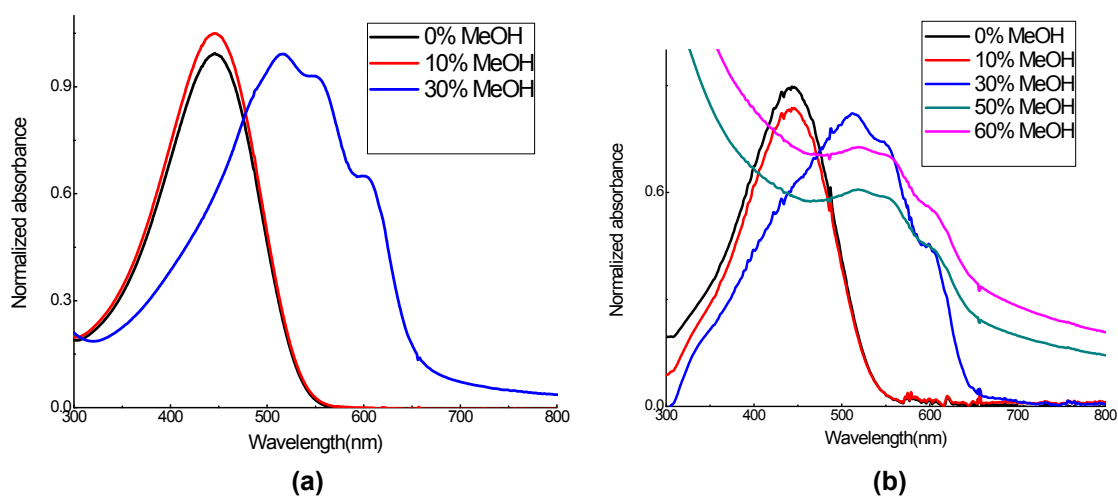

**Figure S6.** Solvatochromism behavior of (a) P3HT precursor and (b) P3HT-*b*-PHIC in THF/methanol mixtures

**Table S1.** Solvatochromism data obtained from THF/H<sub>2</sub>O

| Solvent                      | P3HT ( $\lambda$ , nm) | P3HT- <i>b</i> -PHIC ( $\lambda$ , nm) |
|------------------------------|------------------------|----------------------------------------|
| THF                          | 444                    | 448                                    |
| THF/H <sub>2</sub> O (90:10) | 501, 549, 605          | 511, 554, 605                          |
| THF/H <sub>2</sub> O (70:30) | 508, 553, 606          | 510, 555, 609                          |
| THF/H <sub>2</sub> O (50:50) | 510, 552, 600          | 519, 555, 610                          |
| THF/H <sub>2</sub> O (30:70) | N/A                    | 518, 557, 610                          |
| THF/H <sub>2</sub> O (10:90) | N/A                    | 521, 561, 612                          |

**Table S2.** Solvatochromism data obtained from THF/MeOH

| Solvent           | P3HT ( $\lambda$ , nm) | P3HT- <i>b</i> -PHIC ( $\lambda$ , nm) |
|-------------------|------------------------|----------------------------------------|
| THF               | 444                    | 444                                    |
| THF/MeOH (90:10)  | 444                    | 444                                    |
| THF/ MeOH (70:30) | 510, 555, 606          | 511,555, 604                           |
| THF/ MeOH (50:50) | N/A                    | 521, 560, 606                          |
| THF/ MeOH (30:70) |                        | 523, 558, 616                          |
| THF/ MeOH (10:90) | N/A                    | N/A                                    |

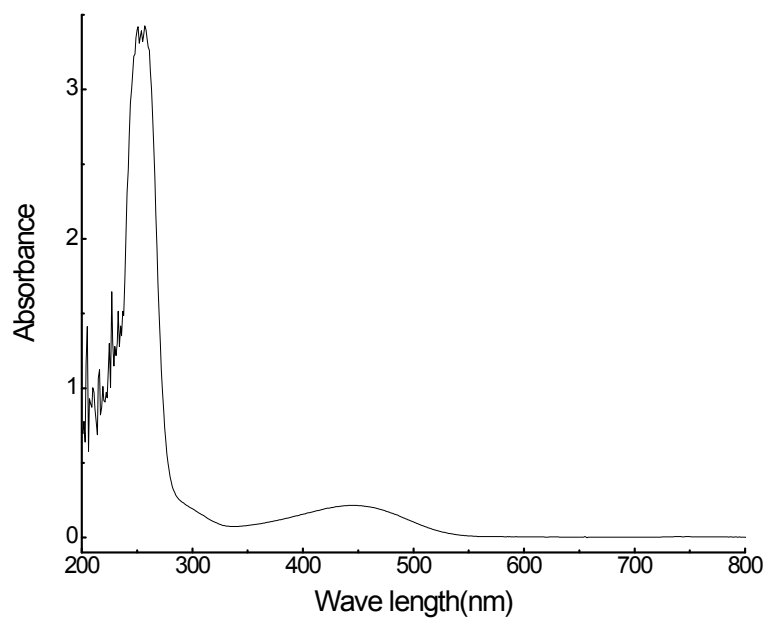

**Figure S7.** A typical UV-Vis spectrum obtained for the P3HT-*b*-PHIC in THF solution

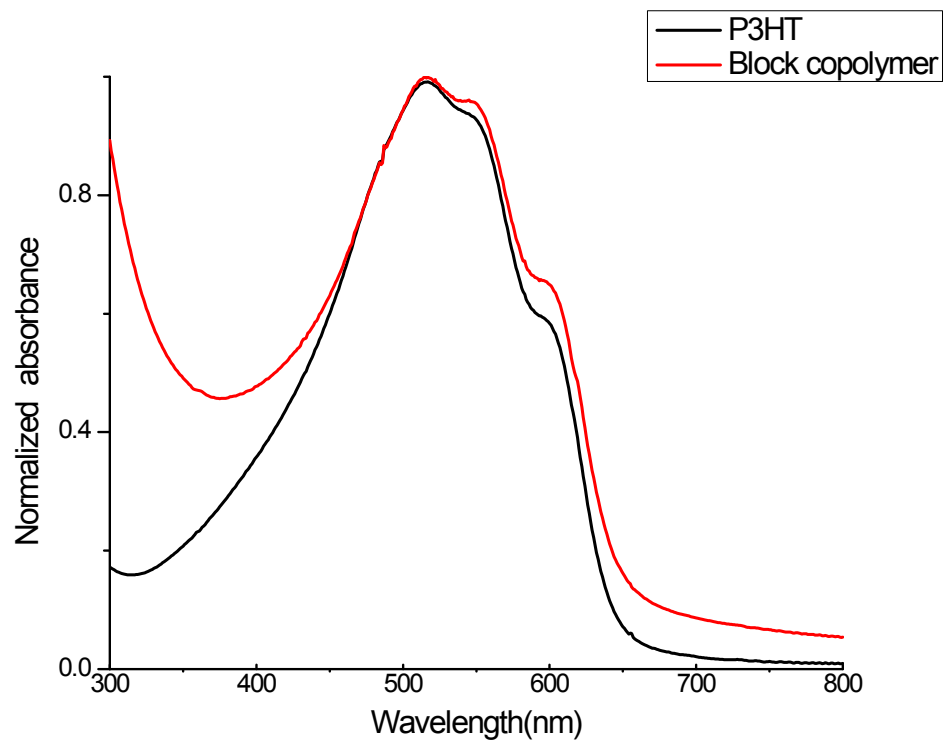

**Figure S8.** UV-Vis spectra of (a) P3HT precursor and (b) P3HT-*b*-PHIC in thin film deposited on glass slide from THF solution



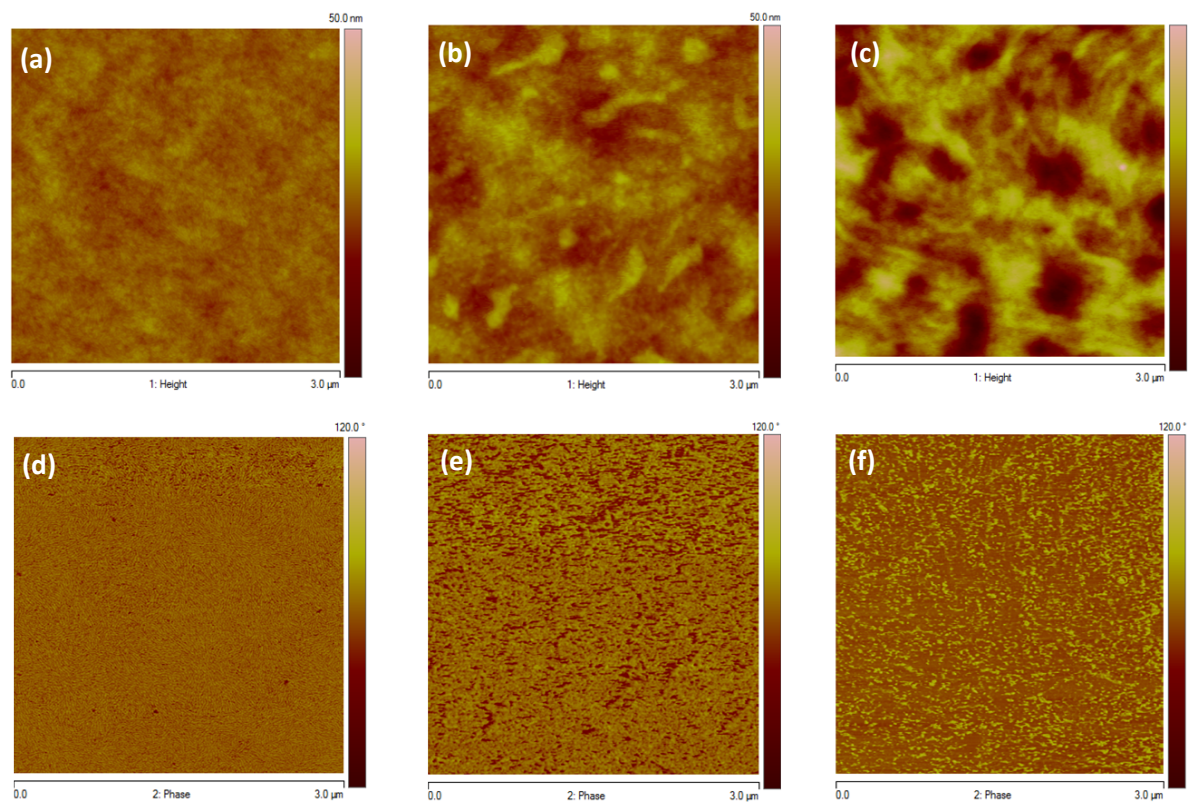

**Figure S9.** TMAFM images of a  $3 \times 3 \mu\text{m}$  region on solar cell devices. (a) Height and (d) phase images on P3HT:PC<sub>61</sub>BM film; (b) Height and (e) phase images on P3HT:PC<sub>61</sub>BM:15%P3HT-*b*-PHIC film; (c) Height and (f) phase images on P3HT:PC<sub>61</sub>BM:30%P3HT-*b*-PHIC film

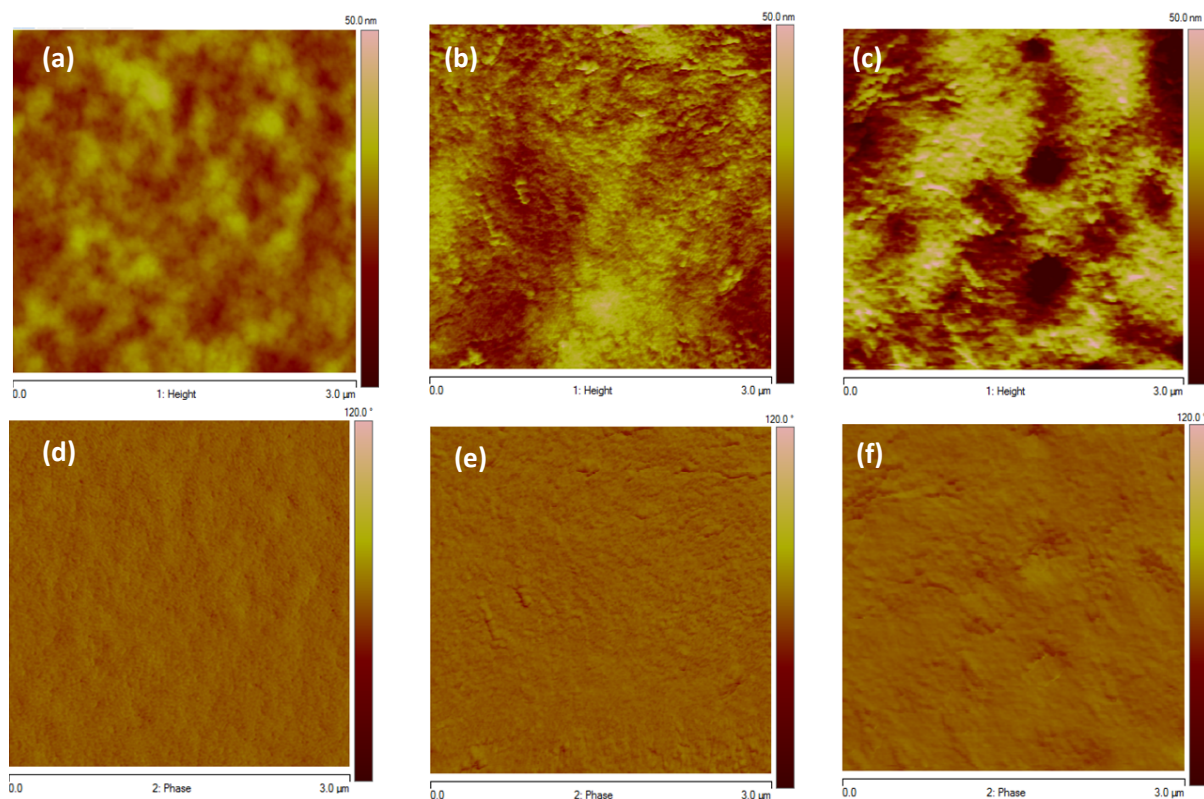

**Figure S10.** TMAFM images of a  $3 \times 3 \mu\text{m}$  region on solar cell devices. (a) Height and (d) phase images on P3HT:PC<sub>71</sub>BM film; (b) Height and (e) phase images on P3HT:PC<sub>71</sub>BM:15%P3HT-*b*-PHIC film; (c) Height and (f) phase images on P3HT:PC<sub>71</sub>BM:30%P3HT-*b*-PHIC film

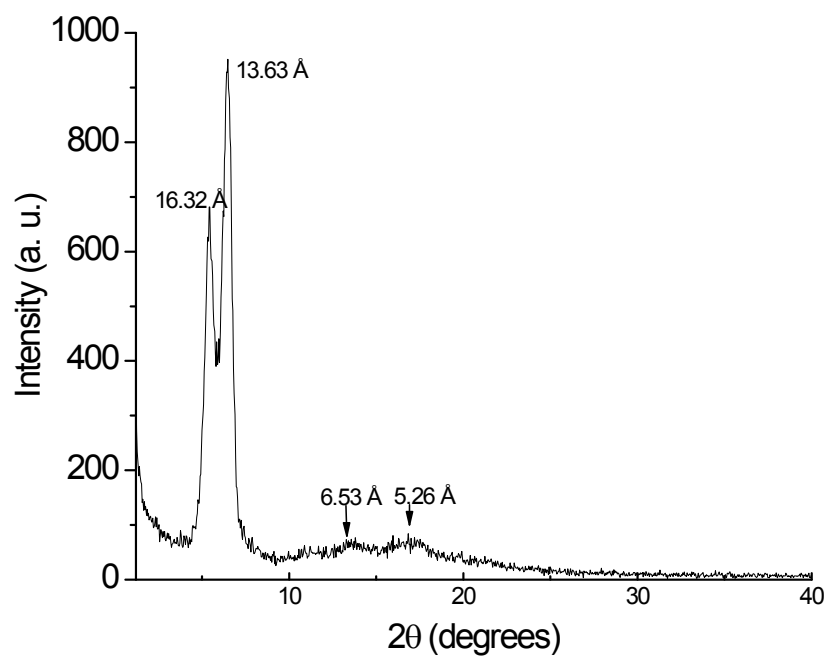

**Figure S11.** X-Ray diffraction pattern of a PHIC homopolymer ( $M_n = 13000 \text{ gmol}^{-1}$ )
